1 **TITLE:**

2 **A universal subcuticular bacterial symbiont of a coral predator, the crown-of-thorns starfish,**  
3 **in the Indo-Pacific**

4  
5 **RUNNING TITLE:**

6 Subcuticular bacterium of a coral predator

7  
8 **AUTHORS:**

9 Naohisa WADA<sup>1,2†</sup>, Hideaki YUASA<sup>3†</sup>, Rei KAJITANI<sup>3</sup>, Yasuhiro GOTOH<sup>4</sup>, Yoshitoshi OGURA<sup>4</sup>, Dai  
10 YOSHIMURA<sup>3</sup>, Atsushi TOYODA<sup>5</sup>, Sen-Lin TANG<sup>2</sup>, Yukio HIGASHIMURA<sup>1</sup>, Hugh SWEATMAN<sup>6</sup>, Zac  
11 FORSMAN<sup>7</sup>, Omri BRONSTEIN<sup>8</sup>, Gal EYAL<sup>9,10</sup>, Naline THONGTHAM<sup>11</sup>, Takehiko ITOH<sup>3\*</sup>, Tetsuya  
12 HAYASHI<sup>4\*</sup>, Nina YASUDA<sup>1\*</sup>

13  
14 **AFFILIATIONS:**

- 15 1: Faculty of Agriculture, University of Miyazaki, 1-1 Gakuenkibanadai-Nishi, Miyazaki, Miyazaki 889-2192, Japan  
16 2: Biodiversity Research Center, Academia Sinica, No.128, Sec 2, Academia Rd, Nangang, Taipei 11529 Taiwan  
17 3: School of Life Science and Technology, Department of Life Science and Technology, Tokyo Institute of Technology,  
18 2-12-1 Ookayama, Meguro-ku, Tokyo 152-8550, Japan  
19 4: Department of Bacteriology, Faculty of Medical Sciences, Kyushu University, 3-1-1 Maidashi Higashi-ku Fukuoka  
20 812-8582, Japan  
21 5: Center for Information Biology, National Institute of Genetics, Yata 1111, Mishima, Shizuoka 411-8540, Japan  
22 6: Australian Institute of Marine Science, PMB No.3, Townsville, QLD 4810, Australia  
23 7: Hawai'i Institute of Marine Biology, School of Ocean & Earth Sciences & Technology, University of Hawai'i at  
24 Mānoa, Coconut Island, Kāne'ohe, HI, United States  
25 8: School of Zoology, Faculty of Life Sciences & Steinhardt Museum of Natural History, Tel Aviv University, Tel Aviv  
26 6997801, Israel  
27 9: ARC Centre of Excellence for Coral Reef Studies, School of Biological Sciences, University of Queensland, St.  
28 Lucia, QLD 4072, Australia  
29 10: The Mina & Everard Goodman Faculty of Life Sciences, Bar-Ilan University, Ramat Gan 5290002, Israel  
30 11: Phuket Marine Biological Center, Box 60, Phuket 83000 Thailand

31  
32  
33 **†CO-FIRST AUTHORS:**

34 Naohisa Wada & Hideki Yuasa

35 **\*CORRESPONDING AUTHORS:**

36 Takehiko ITOH ([takehiko@bio.titech.ac.jp](mailto:takehiko@bio.titech.ac.jp))

37 Tetsuya HAYASHI ([thayash@bact.med.kyushu-u.ac.jp](mailto:thayash@bact.med.kyushu-u.ac.jp))

38 Nina YASUDA ([nina27@cc.miyazaki-u.ac.jp](mailto:nina27@cc.miyazaki-u.ac.jp))

39

## 40 **Abstract**

### 41 **Background:**

42 Population outbreaks of the crown-of-thorns starfish (*Acanthaster planci* sensu lato; COTS), a  
43 primary predator of reef-building corals in the Indo-Pacific Ocean, are major concerns in  
44 coral reef management. While biological and ecological knowledge of COTS has been  
45 accumulating since the 1960s, little is known about its associated bacteria. The aim of this study was  
46 to provide fundamental information on dominant COTS-associated bacteria through a multifaceted  
47 molecular approach.

### 48 **Methods:**

49 A total of 205 COTS individuals from 17 locations throughout the Indo-Pacific Ocean were  
50 examined for the presence of COTS-associated bacteria. We conducted 16S rRNA metabarcoding of  
51 COTS to determine the bacterial profiles of different parts of the body, and generated a full-length  
52 16S rRNA gene sequence from a single dominant bacterium, which we designated COTS27. We  
53 performed phylogenetic analysis to determine the taxonomy, screening of COTS27 across the Indo-  
54 Pacific, FISH to visualize it within the COTS tissues, and reconstruction of the chromosome from  
55 the hologenome sequence data.

### 56 **Results:**

57 We discovered that a single bacterium exists at high densities in the subcuticular space in COTS  
58 forming a biofilm-like structure between the cuticle and the epidermis. COTS27 belongs to a clade  
59 that presumably represents a distinct order (so-called marine spirochetes) in the  
60 phylum *Spirochaetes* and is universally present in COTS throughout the Indo-Pacific Ocean. The  
61 reconstructed genome of COTS27 includes some genetic traits that are probably linked to adaptation  
62 to marine environments and evolution as an extracellular endosymbiont in subcuticular spaces.

### 63 **Conclusions:**

64 COTS27 can be found in three allopatrically speciated COTS species, ranging from northern Red  
65 Sea to the Pacific, implying that symbiotic relationship arose before the speciation (approximately 2  
66 million years ago). The universal association of COTS27 with COTS and nearly mono-specific  
67 association at least with the Indo-Pacific COTS potentially provides a useful model system for  
68 studying symbiont-host interactions in marine invertebrates.

69

### 70 **Keywords:**

71 Crown-of-thorns starfish, subcuticular bacteria, marine spirochetes

72

## 73 **Introduction**

74 Coral reefs support almost one-third of the world's marine coastal species [1,2]. However,  
75 population outbreaks of a coral predator, the crown-of-thorns starfish (*Acanthaster planci* sensu lato;  
76 COTS), are a great threat to Indo-Pacific coral reef ecosystem integrity and biodiversity [3–5]. A 27-  
77 year study of the Great Barrier Reef concluded that COTS outbreaks and tropical cyclones were the  
78 main causes of the loss of reef-building corals (1985-2012) [6]. While some aspects of the biology of  
79 COTS, such as its reproduction, larval ecology, phylogeography, and behaviour, have been studied  
80 intensively [5], little is known about its associated microbiota.

81 The bacterial symbionts of marine invertebrates have been shown to be important to their host  
82 organisms [7]. In echinoderms, bacterial communities may play a role in larval settlement [8], amino  
83 acid uptake on the integument [9], and digestive strategies in the gut [10,11], and these communities  
84 may even drive morphological variations in their host [12]. Bacterial symbionts are prevalent on the  
85 body surfaces of echinoderms [13], showing high host specificity [14,15]. Notably, extracellular  
86 endosymbionts known as subcuticular bacteria (SCB [16]) have been shown to reside under the  
87 cuticular layer of echinoderm fauna from all five extant classes, and it has been postulated that these  
88 bacteria provide dissolved free amino acids to their echinoderm hosts [9,17]. To date, molecular  
89 genetic approaches targeting the 16S rRNA gene have revealed that several proteobacteria  
90 (*Alphaproteobacteria* and *Gammaproteobacteria*) are SCB that are distributed in the subcuticular  
91 space in two brittle star species [13,18], one holothurian species [19], and one asteroid species (19).

92 Despite their potential biological importance, the studies of the bacteria associated with COTS  
93 have been mostly culture-based, and only two culture-independent studies have been published to  
94 date. Carrier et al. reported shifts in the COTS larval microbiomes associated with diet [20]. Høj et  
95 al. found that adult COTS exhibit tissue-specific bacterial communities, largely comprising four  
96 major bacterial groups: *Mollicutes* in male gonads, *Spirochaetales* in the body wall,  
97 *Hyphomonadaxae* in the tube feet, and *Oceanospirillales* in all tissues [21]. Although these studies  
98 significantly increased our understanding of the COTS microbiome, there is still a great lack of  
99 knowledge regarding COTS-associated bacteria, particularly SCB, despite being common in many  
100 echinoderm taxa, where they may play an important role for their host organisms.

101 In the current study, we aimed to obtain primary information on the indigenous bacteria of the  
102 body surface of COTS. We carried out a comprehensive analysis of bacterial symbionts associated  
103 with COTS in a total of 205 individuals collected from the northern Red Sea to the Pacific over a 13-  
104 years period. We highlighted the existence of dominant SCB in COTS, its novel phylogenetic status,  
105 universal distribution in the Indo-Pacific COTS, and its genomic characteristics, all of which provide  
106 insights into interactions between the COTS host and the SCB.

107



## 108 **Results**

### 109 ***Identification of a single OTU (COTS27) that dominates the body surface microbiota*** 110 ***of COTS using 16S rRNA metabarcoding analysis***

111 We used 16S rRNA metabarcoding to analyse the bacterial composition of the microbiota in the  
112 body parts (7-8 body parts; disc spines [top and base], arm spines [top and base], ambulacral spines  
113 [top and base for Okinawa, or the whole spine for Miyazaki], tube feet, and pyloric stomachs;  
114 **Fig.1b**) of six COTS individuals that were collected in Miyazaki and Okinawa, Japan (three  
115 individuals from each location). Seawater samples from the same locations were similarly analysed  
116 for their bacterial compositions (three samples from each location). After quality filtering, 1,427,570  
117 sequences of bacterial origins were obtained from the COTS samples (n=130 for all body parts in  
118 replicates or duplicates; **Suppl. table S1**) and 108,334 bacterial sequences from seawater samples  
119 (n=6) with an averages of 10,981 and 18,056 sequences per sample, respectively (**Suppl. table S2**).  
120 From the abovementioned sequences, 671 bacterial OTUs were identified, 503 and 401 of which  
121 were found in the COTS and seawater samples, respectively. There were 233 OTUs that were  
122 common to both. The OTUs that were identified in the COTS and seawater samples represented the  
123 bacterial taxa with 144 and 96 families, 29 and 22 OTUs were unclassified, 7 and 12 OTUs were as  
124 unknown (classified as bacteria by Silva SINA [22] ), respectively (see more detail in **Suppl. table**  
125 **S3**). The rarefaction curves based on the OTUs indicated that all samples reached saturation points  
126 (**Suppl. fig. S1**).

127 In the six COTS individuals that were examined, the relative abundance showed that a single  
128 unclassified OTU (OTU 1) occupied 61.8% of the total sequences on average, predominantly in most  
129 body parts of both the Okinawan and Miyazaki COTS populations (60.3% and 63.8% of the total  
130 sequences on average were assigned to OTU 1 in the Okinawa and Miyazaki COTS collections,  
131 respectively; **Fig. 2**), despite the fact that these populations were separated by more than 720 km  
132 separating these populations. The high abundance of OTU 1 in all individuals was attributed to the  
133 surface body parts (68.8% and 79.1% of the sequences from all spine and tube foot samples,  
134 respectively), with 8.0% of these sequences originating from the pyloric stomach samples (**Fig. 2** and  
135 **Suppl. table S4**). OTU 1 was abundant at both the aboral (discs and arm spines) and oral  
136 (ambulacral spines and tube feet) sides (**Suppl. fig. S2** and **Suppl. table S4**) of the COTS. The tips  
137 and bases of the spines showed roughly the same levels of OTU 1 abundance (**Suppl. fig. S2** and  
138 **Suppl. table S4**). Five of the 88 spine samples that were examined (containing both tip and base)  
139 exhibited no or only a low abundance of OTU 1 (**Suppl. fig. S2**); however, OTU 1 was abundant in  
140 the other two DNA preparations of the triplicates from the same sample in all cases, suggesting that  
141 the exceptional data from the five preparations were due to some technical problems. OTU 1 was  
142 only detected in the Okinawan seawater samples, in which it showed a low abundance (0.026%;

143 **Suppl. fig. S2).** The relatively abundant bacteria other than OTU 1 are described in **Appendix 1.** In  
144 total, we identified 41 different OTUs, including OTU 1, in all COTS individuals from the two  
145 locations, and these OTUs may represent the core members of the bacterial community of COTS  
146 (**Suppl. fig. S3**). The core bacterial OTUs other than OTU 1 accounted for up to 18.4% (the  
147 abundance of each OTU was less than 3.5%) of the total reads from all COTS samples (**Suppl. fig.**  
148 **S3d**). These results indicate that a single bacterium (OTU 1) predominantly colonizes the body  
149 surface of COTS.

150

### 151 ***Phylogeny of the dominant OTU 1 (COTS27) based on 16S rRNA gene sequences***

152 To elucidate the phylogenetic status of the dominant OTU 1, we determined the full-length 16S  
153 rRNA gene sequences of OTU 1 in five tube foot samples obtained from Miyazaki (n=3) and  
154 Okinawa (n=2). The five sequences were largely identical (99.9-100% similarity), and there was a  
155 partial sequence overlap with the 16S rRNA gene sequence of a spirochete-like bacterium (GenBank  
156 accession No. PRJNA420398) that was a dominant bacterium on the body wall of COTS from the  
157 Great Barrier Reef [21]. The maximum likelihood (ML) phylogenetic tree (**Fig. 3a**) based on full-  
158 length 16S rRNA gene sequences showed that the five sequences related the OTU 1 formed a  
159 distinct subclade within one of the three clades of the unclassified spirochete cluster (named clade I;  
160 **Fig. 3a**). All sequences in this unclassified spirochete cluster originated from marine environments  
161 and marine invertebrates (see **Appendix 2** for more details of clade I) with the exception of a single  
162 sequence obtained from a wetland soil sample (GenBank accession No. FQ660021.1). Hereafter, we  
163 refer to these spirochetes as “marine spirochetes”, as referred to by Høj et al. (2018) [21]. These  
164 marine spirochetes formed a distinct cluster within the phylum *Spirochaetes*, with the order  
165 *Brachyspirales* being their closest relative (**Fig. 3a**). Notably, the 16S rRNA gene sequences of the  
166 marine spirochetes, including the OTU 1 group, showed only a 76.3–78.1% identity to those of the  
167 order *Brachyspirales*, which is well below the proposed threshold for defining a novel order (82.0%)  
168 [23]. Thus, the marine spirochetes most likely represent a distinct order in the phylum *Spirochaetes*.  
169 Hereafter, we refer to the bacterium corresponding to the OTU 1 as COTS27.

170

### 171 ***Universal association of COTS27 with COTS throughout the Indo-Pacific Ocean***

172 The presence of COTS27 or COTS27-like bacteria in COTS individuals inhabiting various  
173 geographic regions was determined in a PCR assay designed to amplify a specific 261 bp fragment  
174 of the COTS27 16S rRNA gene. PCR products were obtained from all 195 COTS individuals that  
175 were collected at 15 locations throughout the Indo-Pacific Ocean comprising three known species of  
176 COTS (**Figs. 1a** and **c**). The sequencing of the PCR products from 53 randomly selected individuals  
177 confirmed the presence of COTS27 or very close relatives. The ML tree based on these 261 bp

178 sequences (**Suppl. fig. S4**) revealed that all sequences formed a tight cluster with the six COTS27  
179 sequences from the abovementioned phylogenetic analysis and with those obtained from the genome  
180 reconstruction described below. However, the sequences from the Israeli COTS population (Red Sea  
181 species) formed a clade separate from those of the Indo-Pacific populations from the northern Indian  
182 Ocean or Pacific Oceans. Among the northern Indo-Pacific species, only one single-nucleotide  
183 polymorphism (SNP) was detected in one sequence obtained from Japan (Wakayama C29 adult JPN;  
184 **Suppl. fig. S4**). These results indicate the universal association of COTS27 with the Indo-Pacific  
185 COTS species.

186

### 187 ***Localization and biofilm-like structure formation of COTS27 in subcuticular spaces*** 188 ***across the body surface of COTS***

189 We observed the localization of COTS27 in COTS tissues using fluorescence *in situ* hybridization  
190 (FISH), as demonstrated by the binding of the general bacterial probe and a COTS27-specific probe  
191 that we designed (the binding signals on the COTS central disc spines are shown in **Fig. 4**). COTS27  
192 was consistently present in the subcuticular spaces on both the aboral side (**Figs. 5a-d**; spines of the  
193 discs and arms, dermal papulae, and pedicellariae, see **Fig. 1b** and **Suppl. fig. S5** for their anatomical  
194 locations and structures) and oral side (**Figs. 5e**; the stems of the tube feet) and the pattern was  
195 similar for all three COTS individuals (**Figs. 4** and **5**). No COTS27 signal or any other bacterial  
196 signals were detected in the pyloric caeca and gonads (**Fig. 5g-h**). Likewise, no COTS27 was found  
197 in the pyloric stomachs, although numerous cyanobacteria-like bacteria were detected (**Fig. 5f**).

198 In the cross-sections, COTS27 displayed continuous layer-like signals (**Figs. 4b, 5a-c** and **5e**),  
199 although a patchy distribution was also occasionally observed. Furthermore, three-dimensional (3D)  
200 images showed that COTS27 formed a biofilm-like structure on the epidermis of the pedicellariae  
201 (**Fig. 5d**). These observations indicate that COTS27 is an SCB that covers nearly all the surface area  
202 (the epidermis) of COTS by forming a biofilm-like structure. COTS27 cells appear to have  
203 filamentous or long rod-like shapes (**Figs. 5c** and **e**), but different approaches such as electron  
204 microscopy are required to accurately determine their cell morphology.

205

### 206 ***Reconstruction of the COTS27 chromosome***

207 We have not yet succeeded in isolation of COTS27, but were able to reconstruct the chromosome  
208 sequence of COTS27 from the hologenome sequences, which contained sequences derived from the  
209 host genome and the associated microbes (**Suppl. table S5**), of a COTS sample collected in  
210 Miyazaki (**Fig. 6** and **Suppl. table S6**), with 90.66% completeness and 0.26% contamination, as  
211 evaluated by CheckM [24]. The structural accuracy of the chromosome was validated based on the  
212 physical coverage of the 15 kbp-mate-pairs (**Suppl. Materials and Methods Fig. 1**), and the circular

213 structure was also confirmed using PCR and Sanger sequencing. We also tested other assembly  
214 pipelines consisting of removal of reads from the host genome, metagenome assemblers, and binning  
215 tools; however, none generated a higher-quality genome of COTS27 nor an obvious chromosome of  
216 a different bacterium (**Suppl. Materials and Methods table 1**). Although 23 gaps remained in the  
217 final assembly, all were derived from tandem repeats in the genic regions, and the estimated gap  
218 sizes were less than 28 bp. The COTS27 chromosome was 2,684,921 bp in length, with a 39.6%  
219 average GC-content, and contained 1,650 protein-coding genes, three rRNA genes, and 35 tRNA  
220 genes. No transposable elements or prophages were detected. The 1,650 protein-coding genes  
221 included one giant gene (53,043 bp in length; COTS27\_01023), but its function is currently  
222 unpredicted (see **Suppl. materials and methods** for the details). Among the three rRNA genes, the  
223 16S rRNA gene was located separately from the 23S and 5S rRNA genes. The 35 tRNA genes  
224 covered all 20 basic amino acids. Phylogenetic analysis using the sequences of 43 conserved marker  
225 genes with 5,656 reference bacterial and archaeal genomes placed COTS27 in the phylum  
226 *Spirochaetes* (**Fig. 3b**), supporting the results of the 16S rRNA sequence-based analysis (**Fig. 3a**).

227

### 228 ***Biological features of COTS27 inferred from the gene repertoire***

229 In the Clusters of Orthologous Groups (COG) functional category-based principal component  
230 analysis of COTS27 performed using 716 high-quality *Spirochaetes* genomes obtained from the  
231 IMG database [25], COTS27 was placed in a distinct position with regard to all *Spirochaetes* (**Suppl.**  
232 **fig. S6**). This indicates potential biological features unique to COTS27. Subsequently, we performed  
233 a Kyoto Encyclopedia of Genes and Genomes (KEGG) pathway analysis to obtain basic information  
234 on the biology of COTS27 (**Suppl. table S7**). Complete or near-complete biosynthesis pathways for  
235 18 of the 20 basic amino acids were identified, excluding those for asparagine and aspartic acid.  
236 Although the guanine ribonucleotide biosynthesis pathway was not complete (one block missing), all  
237 other nucleotide biosynthesis pathways were detected. For vitamin and cofactor biosynthesis, the  
238 complete biosynthetic pathways of nicotinamide adenine dinucleotide (NAD), coenzyme A, and  
239 riboflavin and the C1-unit interconversion were identified. Pathways for fatty acid biosynthesis,  
240 beta-oxidation, and phosphatidylethanolamine biosynthesis were also detected. The conservation of  
241 these metabolic pathways suggests that COTS27 is not strongly metabolically dependent on the host  
242 COTS.

243 Regarding energy production, COTS27 exhibited the complete glycolysis pathway and TCA cycle.  
244 Genes for succinate dehydrogenase, cytochrome c oxidase, and F-type ATPase were also identified;  
245 however, no genes for NADH dehydrogenase were detected. Instead, COTS27 presented an operon  
246 encoding a sodium-pumping NADH:ubiquinone oxidoreductase (Na<sup>+</sup>-NQR) (**Suppl. fig. S7**).

247 Consistent with the general characteristics of *Spirochaetes*, which are generally Gram-  
248 negative, helical or spiral-shaped, and motile, with periplasmic flagella [26], COTS27 contained sets  
249 of genes for the biosynthesis of DAP-type peptidoglycan, lipopolysaccharide and  
250 phosphatidylethanolamine. While a set of genes for flagellar biosynthesis was identified, no gene for  
251 chemotaxis, such as genes encoding methyl-accepting chemotaxis proteins and chemotaxis-related  
252 signal transduction components, was detected.

253

## 254 Discussion

255 We identified a single bacterium that forms a subcuticular biofilm-like structure in Indo-Pacific  
256 COTS although we can not completely exclude a possibility that the signals detected in FISH  
257 analyses included some false-positive signals (because of only *in silico* verification). This bacterium  
258 is universally present and numerically dominant and likely represents a previously undefined order  
259 within the phylum *Spirochaetes*. The universal association of COTS27 with the Indo-Pacific COTS  
260 species suggests a long history of the COTS-COTS27 association. COTS are thought to have  
261 allopatrically diverged into four species during the Pliocene-Early Pleistocene (1.95–3.65 Myr ago)  
262 in the Indo-Pacific Ocean [27]. Therefore, the association of COTS27 with at least three of the four  
263 extant COTS species (data for the fourth species are currently not available) implies that the mutual  
264 relationship between COTS and COTS27 emerged prior to the Pliocene or Early Pleistocene eras.  
265 This hypothesis is supported by the finding that COTS27 from the northern Red Sea (forming a  
266 different cluster from the Indo-Pacific regions; **Suppl. fig. S4**) was notably different from COTS27  
267 from other regions. Additional comparative genomic analyses of the Indo-Pacific COTS and  
268 COTS27 from different geographic regions would provide more detailed insights into the possible  
269 co-evolutionary history. In addition, further studies linking environmental conditions with COTS27  
270 abundance and microbial composition, will help to understand the ecological roles of COTS27.

271 Regarding the evolutionary and functional aspects of COTS27 and its association with COTS,  
272 we obtained two key findings from the genome sequence analysis: 1) the presence of Na<sup>+</sup>-NQR and  
273 2) the selective loss of chemotaxis genes. 1) Some bacteria living in Na<sup>+</sup>-rich environments (e.g.,  
274 marine or intercellular environments) exhibit an Na<sup>+</sup>-NQR that oxidizes NADH to NAD<sup>+</sup> and pumps  
275 Na<sup>+</sup> out of cells, thus functioning in the respiratory chain and in the maintenance of intercellular  
276 homeostasis in Na<sup>+</sup>-rich environments [28]. In line with these features of Na<sup>+</sup>-NQR, only one  
277 genome out of the 716 high-quality *Spirochaetes* genomes (above), which was also reconstituted  
278 from the metagenome sequences of a seawater sample (*Spirochaetaceae* bacterium NP120, IMG  
279 Genome ID: 2509276057), contained the Na<sup>+</sup>-NQR operon. The acquisition of Na<sup>+</sup>-NQR may  
280 represent one of the mechanisms responsible for the adaptation of COT27 to marine environments.  
281 2) Besides, the selective loss of chemotaxis genes is very unusual in *Spirochaetes*; most of the high-



282 quality *Spirochaetes* genomes mentioned above (>98%) contained gene sets for both flagellar  
283 biosynthesis and chemotaxis. The remaining genomes, such as those from the genus *Sphaerochaeta*,  
284 lack genes for both flagellar biosynthesis and chemotaxis, suggesting that chemotaxis genes have  
285 been selectively lost from the COTS27 genome. It has been proposed that the active migration and  
286 colonization by symbionts through motility and chemotaxis are often required for the acquisition of  
287 microbial partners by host organisms from environments [29]. However, the selected lost chemotaxis  
288 genes appear to represent a specific adaptation strategy of COT27 as an SCB. COTS27 may require  
289 flagella to spread and stably and widely colonize subcuticular spaces, but chemotaxis is no longer  
290 required after specially adapting to the subcuticular spaces of COTS. These findings are informing  
291 because these features are likely linked to the adaptation to marine environments and evolution as an  
292 extracellular endosymbiont in the subcuticular space, respectively. Additional genome sequences of  
293 marine spirochetes are required to verify this hypothesis and elucidate the evolutionary and  
294 functional aspects of the COTS27-COTS association.

295 Our study implied that COTS27 as SCB forms a nearly mono-specific symbiotic relationship  
296 with COTS, at least with the Indo-Pacific COTS. SCB, however, are commonly found in echinoderm  
297 fauna [13,19] and have been classified into three morphotypes [13,15,16]. Among these  
298 morphotypes, COTS27 most likely belongs to the SCB Type 2, which exhibits a long spiral shape  
299 and is commonly found among all five echinoderm classes [15,30]. Jackson et al. suggested the  
300 presence of a highly dominant *Spirochaetae* in the hard tissues (including the body wall) of some  
301 starfish species in the United States and Australia [31]. Such a wide distribution of spirochetes or  
302 spirochete-like bacteria in echinoderms suggests that many echinoderms may have established  
303 symbiotic relationships with marine spirochetes that are similar to that between COTS27 and COTS.  
304 Further explorations of SCB in a wider range of echinoderms would provide more detailed insights  
305 into the association between echinoderm hosts and marine spirochetes.

306 The outer body surfaces of marine organisms often represent a highly active interface between  
307 an organism (host) and the surrounding marine environment regarding aspects such as light  
308 exposure, gas exchange, nutrient uptake and interactions with other fouling organisms, consumers,  
309 and pathogens [32]. The presence of SCB among different echinoderms has been reviewed in  
310 different bacterial taxa [13,18,19]. Although it is also plausible that SCB play hypothetical role in  
311 their interactions with the host such as nutrition transfer [9,33], or antibiotics production [14,34], or  
312 even that their presence may be vestigial, remaining as leftovers from a previously mutualistic  
313 partnership [15], the physiological and potential ecological roles of SCB are largely unclear and  
314 remain unexplored. The universal and nearly mono-specific association of COTS27 with COTS  
315 would provide an ideal model system for further exploring the roles of SCB as well as symbiont-host

316 interactions in marine invertebrates. Moreover, COTS27 could be used as an environmental marker  
317 to monitor and/or predict population outbreaks of COTS.

318

## 319 **Conclusions**

320 Despite the fact that the 205 COTS individuals utilized in our current analyses were collected over a  
321 13-year period (2004–2017) and from 17 different locations across the Indo-Pacific, the COTS27  
322 association remained exceptionally ubiquitous both spatially and temporally. Additionally, it is likely  
323 that COTS hosted COTS27 as an extracellular endosymbiont for more than 2 million years before  
324 allopatric speciation occurred during the Pliocene-Early Pleistocene suggesting a strong association.  
325 COTS27 is likely an extracellular endosymbiotic bacteria strongly associated with COTS as an SCB.  
326 COTS27 also would acquire the Na<sup>+</sup>-NQR system for adapting to marine environment since the  
327 speciation within phylum *Spirochaetes*. The lack of chemotaxis genes in COTS27 would  
328 physiologically associate with optimization in subcuticular space of COTS. Although the functional  
329 role of COTS27 as an SCB is still unclear, this close relationship and chromosome genome  
330 information of COTS27 described here will significantly contribute to testing the hypotheses of  
331 symbiotic function in SCB, and may also provide as a model system for studying endosymbionts in  
332 marine invertebrates more broadly.

333

## 334 **Materials and Methods**

### 335 ***Sample collection and preparation for DNA analyses and histology***

336 We collected 205 individual COTS from 17 locations throughout the Indo-Pacific collected over a 13  
337 year period (2004-2017; **Fig. 1a**, and **Suppl. table S8**). For 16S rRNA metabarcoding, six  
338 individuals were collected in Okinawa and Miyazaki (three from each location) in Japan (**Fig.1a**).  
339 The specimens were dissected to facilitate sampling from different body parts (7-8 body parts; **Fig.**  
340 **1b,c**) which was done in triplicate or duplicate (**Suppl. table S1**). Seawater samples were also  
341 collected in triplicate from each of the last two locations. Consequently, 130 DNA samples were  
342 prepared from the six COTS individuals (**Suppl. table S1**) and six seawater DNA samples and used  
343 for the metabarcoding analysis. The tube foot DNA samples from five of the six individuals were  
344 used to determine the full-length 16S rRNA gene sequence of the dominant OTU 1. DNA samples  
345 prepared from the tube feet of 195 individuals collected from 15 geographic locations were used to  
346 examine the presence of COTS27 (the dominant OTU 1) in three species of COTS [35] (**Fig. 1a, c**,  
347 and **Suppl. table S8**). DNA from the tube feet of one individual collected in Miyazaki (Japan) was  
348 used for the COTS hologenome sequencing (**Suppl. table S8**). [36]. Note that the experiment was  
349 designed to capture both the host and an associated microbiome genomes as a hologenome. Samples

350 of six different body parts (**Fig. 1b, c**) were prepared from the remaining other three individuals  
351 collected in Miyazaki for the FISH analyses.

352 We provide a more detailed description of the above collection and preparation methods in the  
353 **Suppl. materials and methods**.

354

### 355 ***16S rRNA metabarcoding***

356 16S rRNA amplicon libraries (V4 region) were prepared as previously described [37,38] using the  
357 primers listed in **Suppl. table S9** and **Suppl. fig. S8** and subjected to paired-end (PE) sequencing (2  
358 x 300 bp) using the Illumina MiSeq platform. In total, 130 DNA samples including the samples  
359 collected from 7-8 body parts of six COTS individuals (**Suppl. table S1**), and six seawater DNA  
360 samples were analysed. The obtained PE sequences were processed using software USEARCH  
361 v8.1.1861 [39] and MOTHUR v.1.36.1 [40] software for the merging, the filtering, the OTU  
362 clustering, and the taxonomic assignment of the sequence (see more detail in **Suppl. materials and**  
363 **methods**). Finally, a total of 1,535,904 sequences were assigned to bacteria. The others were  
364 assigned to eukaryotes (55,377 reads containing 74.7% of COTS genes), Archaea (12,686 reads),  
365 chloroplasts (19,715 reads), or unknown origins (476,795 reads containing 99.4% of COTS genes),  
366 and were excluded from our study (**Suppl. table S2**).

367

### 368 ***Phylogenetic analysis of OTU 1 using the full-length 16S rRNA gene sequence***

369 Full-length 16S rRNA gene sequences of OTU 1 were obtained from each tube foot of five COTS  
370 individuals using a specific primer set for OTU 1 that was designed in this study (**Suppl. materials**  
371 **and methods**, **Suppl. table S9** and **Suppl. fig. S8**). The sequences were used to reconstruct the  
372 phylogenetic tree using the maximum likelihood (ML) method (**Suppl. materials and methods**). As  
373 OTU 1 was revealed to represent a unique clade of bacteria present in COTS, we hereafter refer to  
374 this bacterium as COTS27.

375

### 376 ***PCR screening and sequencing of COTS27***

377 In total 195 COTS individuals were screened for the presence of COTS27 on their tube feet by PCR  
378 using primers that were designed to specifically amplify a 261 bp fragment of the 16S rRNA gene  
379 (**Suppl. table S9** and **Suppl. fig. S8**). The PCR products obtained from 53 randomly selected  
380 samples from all COTS27-positive samples (n=195) were sequenced and used for phylogenetic  
381 reconstruction (**Suppl. materials and methods**).

382

### 383 ***Fluorescence in situ hybridization (FISH)***



384 The FISH experiments were performed on three serial sections (thickness of 5  $\mu\text{m}$ ) from the six body  
385 parts of the three individuals (**Fig. 1b,c**) as previously described [41]. FISH was performed  
386 separately with three different probes: COTS27-specific oligonucleotide probe (COTSsymb; for  
387 more detail of the probe design, see in **Suppl. materials and methods, Suppl. table S9** and **Suppl.**  
388 **fig. S8**), a Eubacterial probe (EUB338mix [42]), and a nonsense probe (Non338 [43]). Bacterial  
389 localization was observed using a confocal laser scanning microscope (LSM 550; Zeiss, Germany)  
390 (see more detail in **Suppl. materials and methods**). In addition, we reconstructed three-dimensional  
391 (3D) structures from thick sections (thickness: 50  $\mu\text{m}$ ) of the disc spines using a confocal laser  
392 scanning microscope (LSM770; Zeiss, Germany),  
393

### 394 ***Reconstitution of the COTS27 chromosome from the hologenome sequences of a*** 395 ***COTS sample***

396 Two PE libraries and six mate-pair libraries from the tube foot of one individual were prepared and  
397 sequenced using Illumina HiSeq 2500 sequencers. *De novo* assembly was performed using Platanus  
398 v. 1.2.3 [44]. To identify the COTS27-derived sequences in the hologenome assembly, scaffolds  
399 with a high coverage depth ( $\geq \times 200$ ), which probably reflected the high abundance of the species,  
400 were selected. The average coverage depth for all scaffolds was  $\times 130$ , and it was assumed that most  
401 of the scaffolds from the host COTS genome exhibited coverage depths  $< \times 200$ . The longest scaffold,  
402 which was identified as the COTS27 chromosome, was closed by Sanger sequencing, and an  
403 alternative assembly was obtained using Platanus-alley v. 2.0.0 [45]. A circular view of the COTS27  
404 chromosome was generated using the CGView Server [46] with manual processing. The  
405 completeness of the final assembly was evaluated using CheckM v. 1.0.11 [24], and the structural  
406 accuracy of the assembly was validated based on the physical coverage of the 15 kbp-mate-pairs  
407 (See Suppl. materials and methods for the details). We also tested other assembly pipelines  
408 consisting of removal of reads from the host genome, metagenome assemblers, and binning tools  
409 (See Suppl. materials and methods for details).  
410

### 411 ***Gene prediction and functional annotation***

412 Protein-coding sequences (CDSs) were predicted by using PROKKA v. 1.12 [47], followed by  
413 manual curation. For functional annotation, Clusters of Orthologous Groups (COG) were assigned  
414 by querying the CDSs against the Conserved Domain Database (CDD) with COG position-specific  
415 scoring matrices (PSSMs) using RPS-BLAST. Additionally, K numbers of Kyoto Encyclopedia of  
416 Genes and Genomes (KEGG) were assigned to each CDS; BlastKOALA [48] and KofamKOALA  
417 [49] were used to perform searches in the KEGG GENES and KOfam databases, respectively.  
418

419 ***Principal component analysis and phylogenetic analysis based on the genome***  
420 ***sequences***

421 Principal component analysis was performed based on the compositions of the COG functional  
422 categories. The genome sequences of the *Spirochaetes* bacteria were retrieved from the DOE-JGI  
423 IMG database, and 716 high-quality genomes (completeness >90% and contamination <5% as  
424 evaluated by CheckM v. 1.0.11 [24]) were retained (see **Suppl. materials and methods** for the  
425 details). Whole-genome sequence-based phylogenetic analysis was performed using CheckM to  
426 obtain the ML tree of COTS27 and 5,656 bacterial and archaeal genomes based on the sequences of  
427 43 conserved marker genes. The tree was visualized using FigTree v. 1.4.3  
428 (<http://tree.bio.ed.ac.uk/software/figtree/>).

429

430

431 **List of abbreviations**

432 CDD: Conserved Domain Database  
433 CDSs: Protein-coding sequences  
434 COG: Clusters of Orthologous Groups  
435 COTS: Crown-of-thorns starfish  
436 FISH: Fluorescence *in situ* hybridization  
437 KEGG: Kyoto Encyclopedia of Genes and Genomes  
438 ML: Maximum likelihood  
439 NAD: Nicotinamide adenine dinucleotide  
440 Na<sup>+</sup>-NQ: Sodium-pumping NADH:ubiquinone oxidoreductase  
441 OTU: Operational taxonomic unit  
442 SCB: Subcuticular bacteria

443

444 **Declarations**

445 • ***Ethics approval and consent to participate***

446 Not Applicable

447

448 • ***Consent for publication***

449 Not applicable

450

451 • ***Availability of data and material***

452 All sequences produced for this study have been deposited in the DDBJ under BioProject accession  
453 number PRJDB4009 for the 16S metabarcoding and COTS27 chromosome data and accession

454 numbers LC490103 - LC490107 and LC495323 – LC495375 for the 16S rRNA gene sequence-  
455 based phylogeny.

456

457 • ***Competing interests***

458 The authors declare that they have no competing interests.

459

460 • ***Funding***

461 This study was supported by JSPS KAKENHI 221S0002, 16H06279 (PAGS), Grant-in-aid for  
462 Young Scientists (A) (17H04996) and (B) (25870563), the Program to Disseminate Tenure Tracking  
463 System in University of Miyazaki, the Environment Research and Technology Development Fund  
464 (4RF-1501), MOE, Japan, the postdoctoral fellows programme of Academia Sinica (2nd session,  
465 2017), Grant-in-Aid for JSPS Fellows (18J23317), and the European Union’s Horizon 2020 research  
466 and innovation programme under MSCA No. 796025.

467

468 • ***Authors’ contribution***

469 N.W., H.Y., T.I., T. H, and N.Y. conceived the research idea and designed the experiments. N.W.,  
470 H.Y., Y. H, H. S, Z.F., O. B, G.E., N.T., and N.Y. conducted the field sampling. N.W., Y.G., and  
471 N.Y. performed the 16S rRNA metabarcoding. N.W. and N.Y. performed the phylogenetic analysis  
472 using the full-length 16S rRNA gene. N.W. H. S, Z.F., OB, N.T., and N.Y. performed the PCR  
473 screening and sequencing of the PCR products. N.W. conducted the FISH experiments. H.Y., R.K.,  
474 D.Y., and A.T. conducted the sequencing and analysis of the COTS27 genome. N.W., H.Y., T.I., T.  
475 H, and N.Y. made major contributions to the manuscript writing and figure making. R.K., Y.G.,  
476 Y.O., S.T., H.S., Z.F., O.B., and G.E. contributed to writing and editing the manuscript. All authors  
477 critically reviewed, revised and ultimately approved this final version.

478

479 • ***Acknowledgements***

480 We thank members of Yasuda Laboratory and Atsushi Toyoda Laboratory, J. Suzuki, H. Kagawa, S.  
481 Nagai, Y. R. Kubota, Y. Uchida, K. Sakai, T. Miki, C. Shinzato, L. Høj, and D. Bourne for their  
482 logistical and technical support. We also thank M. Timmers, O. Ben-Zvi, N. Phongsuwan, S. Ayalon,  
483 the Seaver Institute, and the Interuniversity Institute for Marine Sciences of Eilat for local sampling  
484 and analysis.

485

486 **References**

487 1. Spalding MD, Ravilious C, Green EP. World atlas of coral reefs. Prepared at the UNEP World  
488 Conservation Monitoring Centre. Univ Calif Berkeley EEUULinks. 2001;

- 489 2. Wilkinson C. Status of coral reefs of the world: 2004. Australian Institute of Marine Science;  
490 2004.
- 491 3. Moran P, Bradbury R. The crown-of-thorns starfish controversy. *Search*. 1989;20:3–6.
- 492 4. Birkeland C, Lucas J. *Acanthaster planci*: Major Management Problem of Coral Reefs. CRC  
493 Press; 1990.
- 494 5. Pratchett MS, Caballes CF, Sweatman JAR-P& HPA. Limits to Understanding and Managing  
495 Outbreaks of Crown- of- Thorns Starfish (*Acanthaster* spp.). *Oceanogr Mar Biol*. 2014;52:133–200.
- 496 6. De'ath G, Fabricius KE, Sweatman H, Puotinen M. The 27–year decline of coral cover on the  
497 Great Barrier Reef and its causes. *Proc Natl Acad Sci*. 2012;109:17995–9.
- 498 7. McFall-Ngai M, Hadfield MG, Bosch TCG, Carey HV, Domazet-Lošo T, Douglas AE, et al.  
499 Animals in a bacterial world, a new imperative for the life sciences. *Proc Natl Acad Sci*.  
500 2013;110:3229–36.
- 501 8. Bryan PJ, Rittschof D, McClintock JB. Bioactivity of echinoderm ethanolic body-wall extracts: an  
502 assessment of marine bacterial attachment and macroinvertebrate larval settlement. *J Exp Mar Biol*  
503 *Ecol*. 1996;196:79–96.
- 504 9. Lesser MP, Walker CW. Comparative study of the uptake of dissolved amino acid in sympatric  
505 brittle stars with and without endosymbiotic bacteria. *Comp Biochem Physiol Part B Comp*  
506 *Biochem*. 1992;101:217–23.
- 507 10. Thorsen MS. Abundance and biomass of the gut-living microorganisms (bacteria, protozoa and  
508 fungi) in the irregular sea urchin *Echinocardium cordatum* (Spatangoida: Echinodermata). *Mar Biol*.  
509 1999;133:353–60.
- 510 11. Thorsen MS, Wieland A, Ploug H, Kragelund C, Nielsen PH. Distribution, identity and activity  
511 of symbiotic bacteria in anoxic aggregates from the hindgut of the sea urchin *echinocardium*  
512 *cordatum*. *Ophelia*. 2003;57:1–12.
- 513 12. Balakirev ES, Pavlyuchkov VA, Ayala FJ. DNA variation and symbiotic associations in  
514 phenotypically diverse sea urchin *Strongylocentrotus intermedius*. *Proc Natl Acad Sci*.  
515 2008;105:16218–23.

- 516 13. Burnett WJ, McKenzie JD. Subcuticular bacteria from the brittle star *Ophiactis balli*  
517 (Echinodermata: Ophiuroidea) represent a new lineage of extracellular marine symbionts in the alpha  
518 subdivision of the class *Proteobacteria*. *Appl Environ Microbiol.* 1997;63:1721–4.
- 519 14. McKenzie JD, Kelly MS. Comparative study of sub-cuticular bacteria in brittlestars  
520 (Echinodermata: Ophiuroidea). *Mar Biol.* 1994;120:65–80.
- 521 15. Kelly MS, McKenzie JD. Survey of the occurrence and morphology of sub-cuticular bacteria in  
522 shelf echinoderms from the north-east Atlantic Ocean. *Mar Biol.* 1995;123:741–56.
- 523 16. Holland ND, Neelson KH. The Fine Structure of the Echinoderm Cuticle and the Subcuticular  
524 Bacteria of Echinoderms. *Acta Zool.* 1978;59:169–85.
- 525 17. McKenzie JD, Black KD, Kelly MS, Newton LC, Handley LL, Scrimgeour CM, et al.  
526 Comparisons of fatty acid and stable isotope ratios in symbiotic and non-symbiotic brittlestars from  
527 Oban Bay, Scotland. *J Mar Biol Assoc U K.* 2000;80:311–20.
- 528 18. Morrow KM, Tedford AR, Pankey MS, Lesser MP. A member of the Roseobacter clade,  
529 *Octadecabacter* sp., is the dominant symbiont in the brittle star *Amphipholis squamata*. *FEMS*  
530 *Microbiol Ecol.* 2018;94:fly030.
- 531 19. Lawrence SA, O’Toole R, Taylor MW, Davy SK. Subcuticular Bacteria Associated With Two  
532 Common New Zealand Echinoderms: Characterization Using 16S rRNA Sequence Analysis and  
533 Fluorescence *in situ* Hybridization. *Biol Bull.* 2010;218:95–104.
- 534 20. Carrier TJ, Wolfe K, Lopez K, Gall M, Janies DA, Byrne M, et al. Diet-induced shifts in the  
535 crown-of-thorns (*Acanthaster* sp.) larval microbiome. *Mar Biol.* 2018;165:157.
- 536 21. Høj L, Levy N, Baillie BK, Clode PL, Strohmaier RC, Siboni N, et al. Crown-of-Thorns Sea Star  
537 *Acanthaster* cf. *solaris* Has Tissue-Characteristic Microbiomes with Potential Roles in Health and  
538 Reproduction. *McBain AJ, editor. Appl Environ Microbiol.* 2018;84:e00181-18.
- 539 22. Pruesse E, Peplies J, Glöckner FO. SINA: Accurate high-throughput multiple sequence  
540 alignment of ribosomal RNA genes. *Bioinformatics.* 2012;28:1823–9.
- 541 23. Yarza P, Yilmaz P, Pruesse E, Glöckner FO, Ludwig W, Schleifer K-H, et al. Uniting the  
542 classification of cultured and uncultured bacteria and archaea using 16S rRNA gene sequences. *Nat*  
543 *Rev Microbiol.* 2014;12:635–45.

- 544 24. Parks DH, Imelfort M, Skennerton CT, Hugenholtz P, Tyson GW. CheckM: assessing the quality  
545 of microbial genomes recovered from isolates, single cells, and metagenomes. *Genome Res.*  
546 2015;25:1043–55.
- 547 25. Chen I-MA, Chu K, Palaniappan K, Pillay M, Ratner A, Huang J, et al. IMG/M v.5.0: an  
548 integrated data management and comparative analysis system for microbial genomes and  
549 microbiomes. *Nucleic Acids Res.* 2019;47:D666–77.
- 550 26. Paster BJ. Phylum XV. Spirochaetes Garrity and Holt 2001. In: Krieg NR, Staley JT, Brown DR,  
551 Hedlund BP, Paster BJ, Ward NL, et al., editors. *Bergey's Manual® Syst Bacteriol Vol Four*  
552 *Bacteroidetes Spirochaetes Tenericutes Mollicutes Acidobacteria Fibrobacteres Fusobacteria*  
553 *Dictyoglomi Gemmatimonadetes Lentisphaerae Verrucomicrobia Chlamydiae Planctomycetes.* New  
554 York, NY: Springer New York; 2010. p. 471–566.
- 555 27. Vogler C, Benzie J, Lessios H, Barber P, Wörheide G. A threat to coral reefs multiplied? Four  
556 species of crown-of-thorns starfish. *Biol Lett.* 2008;4:696–9.
- 557 28. Reyes-Prieto A, Barquera B, Juárez O. Origin and Evolution of the Sodium -Pumping NADH:  
558 Ubiquinone Oxidoreductase. *PLOS ONE.* 2014;9:e96696.
- 559 29. Raina J-B, Fernandez V, Lambert B, Stocker R, Seymour JR. The role of microbial motility and  
560 chemotaxis in symbiosis. *Nat Rev Microbiol.* 2019;17:284.
- 561 30. Kelly MS, Barker MF, McKenzie JD, Powell J. The Incidence and Morphology of Subcuticular  
562 Bacteria in the Echinoderm Fauna of New Zealand. *Biol Bull.* 1995;189:91–105.
- 563 31. Jackson EW, Pepe-Ranney C, Debenport SJ, Buckley DH, Hewson I. The Microbial Landscape  
564 of Sea Stars and the Anatomical and Interspecies Variability of Their Microbiome. *Front Microbiol.*  
565 2018;9:1829.
- 566 32. Wahl M, Goecke F, Labes A, Dobretsov S, Weinberger F. The Second Skin: Ecological Role of  
567 Epibiotic Biofilms on Marine Organisms. *Front Microbiol.* 2012;3.
- 568 33. Walker CW, Lesser MP. Nutrition and development of brooded embryos in the brittlestar  
569 *Amphipholis squamata*: do endosymbiotic bacteria play a role? *Mar Biol.* 1989;103:519–30.
- 570 34. Strahl ED, Dobson WE, Lundie Jr LL. Isolation and Screening of Brittlestar-Associated Bacteria  
571 for Antibacterial Activity. *Curr Microbiol.* 2002;44:450–9.

- 572 35. Haszprunar G, Spies M. An integrative approach to the taxonomy of the crown-of-thorns starfish  
573 species group (*Asteroidea: Acanthaster*): A review of names and comparison to recent molecular  
574 data. *Zootaxa*. 2014;3841:271–84.
- 575 36. Yasuda N, Taquet C, Nagai S, Yoshida T, Adjeroud M. Genetic connectivity of the coral-eating  
576 sea star *Acanthaster planci* during the severe outbreak of 2006–2009 in the Society Islands, French  
577 Polynesia. *Mar Ecol*. 2015;36:668–78.
- 578 37. Apprill A, McNally S, Parsons R, Weber L. Minor revision to V4 region SSU rRNA 806R gene  
579 primer greatly increases detection of SAR11 bacterioplankton. *Aquat Microb Ecol*. 2015;75:129–37.
- 580 38. Walters W, Hyde ER, Berg-Lyons D, Ackermann G, Humphrey G, Parada A, et al. Improved  
581 Bacterial 16S rRNA Gene (V4 and V4-5) and Fungal Internal Transcribed Spacer Marker Gene  
582 Primers for Microbial Community Surveys. *mSystems*. 2016;1:e00009-15.
- 583 39. Edgar RC. Search and clustering orders of magnitude faster than BLAST. *Bioinformatics*.  
584 2010;26:2460–1.
- 585 40. Schloss PD, Westcott SL, Ryabin T, Hall JR, Hartmann M, Hollister EB, et al. Introducing  
586 mothur: Open-Source, Platform-Independent, Community-Supported Software for Describing and  
587 Comparing Microbial Communities. *Appl Environ Microbiol*. 2009;75:7537–41.
- 588 41. Wada N, Pollock FJ, Willis BL, Ainsworth T, Mano N, Bourne DG. *In situ* visualization of  
589 bacterial populations in coral tissues: pitfalls and solutions. *PeerJ*. 2016;4:e2424.
- 590 42. Daims H, Brühl A, Amann R, Schleifer KH, Wagner M. The domain-specific probe EUB338 is  
591 insufficient for the detection of all Bacteria: development and evaluation of a more comprehensive  
592 probe set. *Syst Appl Microbiol*. 1999;22:434–44.
- 593 43. Wallner G, Amann R, Beisker W. Optimizing fluorescent in situ hybridization with rRNA-  
594 targeted oligonucleotide probes for flow cytometric identification of microorganisms. *Cytometry*.  
595 1993;14:136–43.
- 596 44. Kajitani R, Toshimoto K, Noguchi H, Toyoda A, Ogura Y, Okuno M, et al. Efficient de novo  
597 assembly of highly heterozygous genomes from whole-genome shotgun short reads. *Genome Res*.  
598 2014;24:1384–95.



- 599 45. Kajitani R, Yoshimura D, Okuno M, Minakuchi Y, Kagoshima H, Fujiyama A, et al. Platanus-  
600 allee is a de novo haplotype assembler enabling a comprehensive access to divergent heterozygous  
601 regions. *Nat Commun.* 2019;10:1702.
- 602 46. Stothard P, Wishart DS. Circular genome visualization and exploration using CGView.  
603 *Bioinformatics.* 2005;21:537–9.
- 604 47. Seemann T. Prokka: rapid prokaryotic genome annotation. *Bioinformatics.* 2014;30:2068–9.
- 605 48. Kanehisa M, Sato Y, Morishima K. BlastKOALA and GhostKOALA: KEGG Tools for  
606 Functional Characterization of Genome and Metagenome Sequences. *J Mol Biol.* 2016;428:726–31.
- 607 49. Aramaki T, Blanc-Mathieu R, Endo H, Ohkubo K, Kanehisa M, Goto S, et al. KofamKOALA:  
608 KEGG ortholog assignment based on profile HMM and adaptive score threshold. *Bioinformatics.*  
609 2019;btz859.

610

611 **Figure Legends**

612



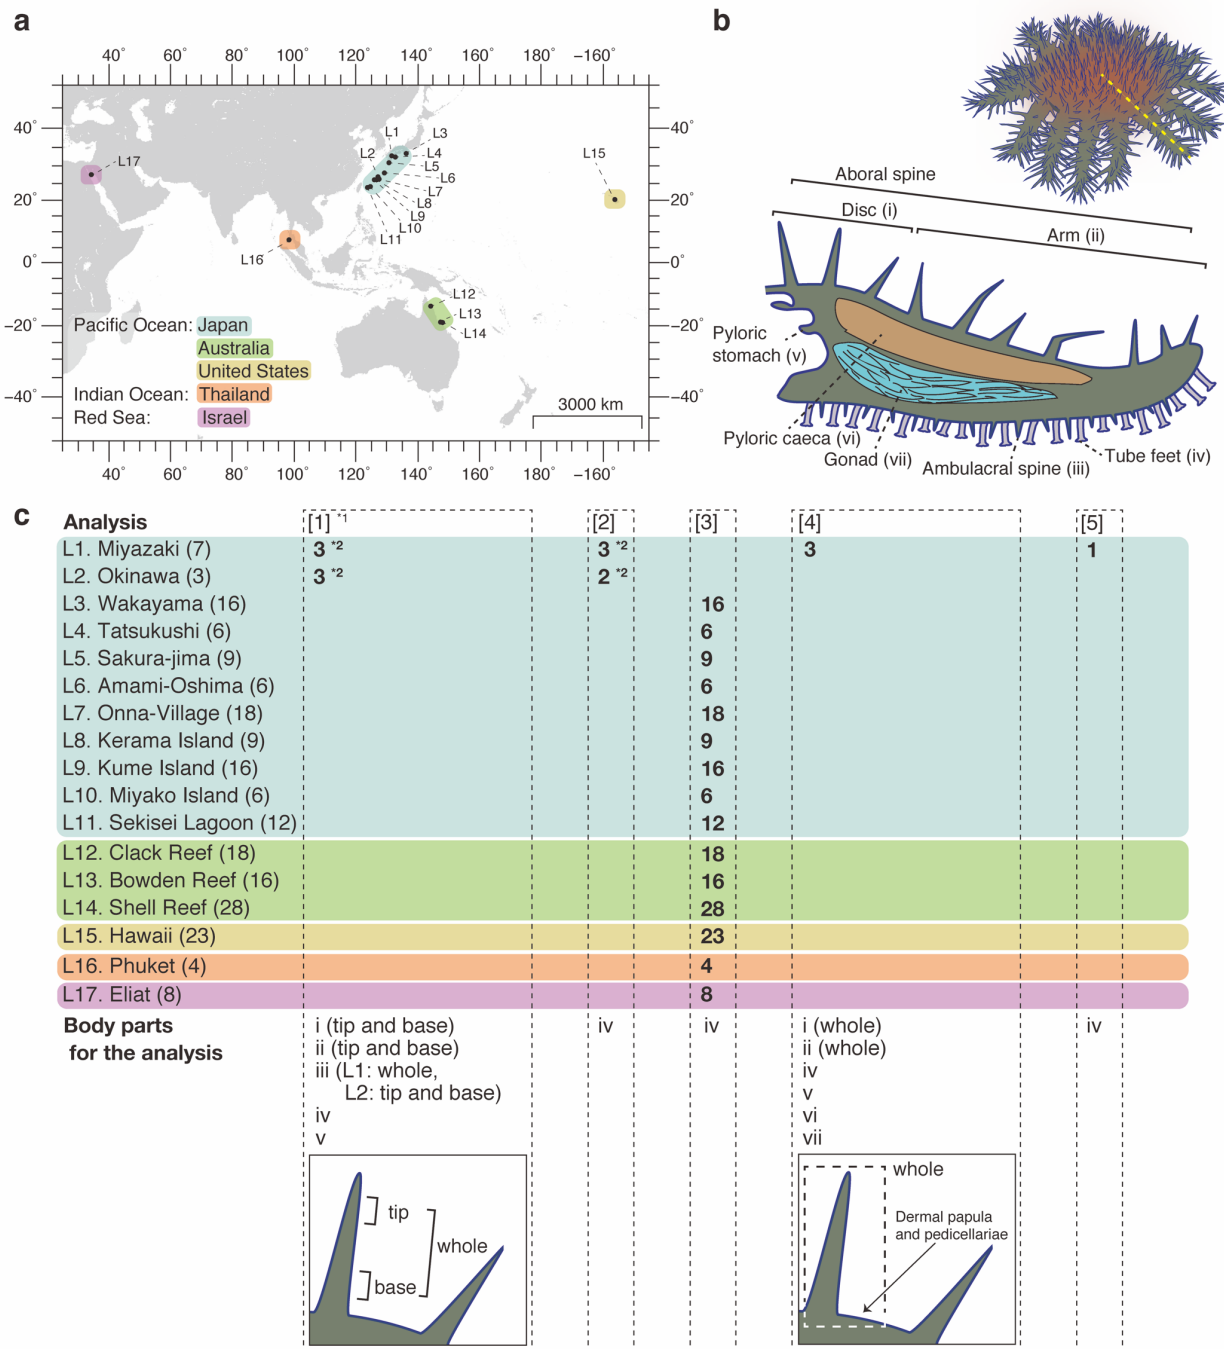

613

614 **Fig. 1 Geographic and anatomical distributions of COTS individuals and the COTS body parts**  
 615 **analysed in this study.**

616 The seventeen locations where the COTS individuals were collected (**a**) and the dissected body parts  
 617 of COTS for the analyses (**b**) are shown. The dashed yellow line (panel **b**) indicates the dissection  
 618 line for the cross-sectional view. In panel (**c**), details of the samples used in each analysis are shown:  
 619 [1] 16S rRNA metabarcoding, [2] phylogenetic analysis using the full-length 16S rRNA gene  
 620 sequences, [3] PCR screening and sequencing of the 16S rRNA gene sequences of COTS27, [4]

621 FISH analysis, and [5] hologenome sequencing analysis. \*1: This analysis was performed in  
 622 triplicate for each sample. \*2: The same individuals were used in analyses [1] and [2].  
 623

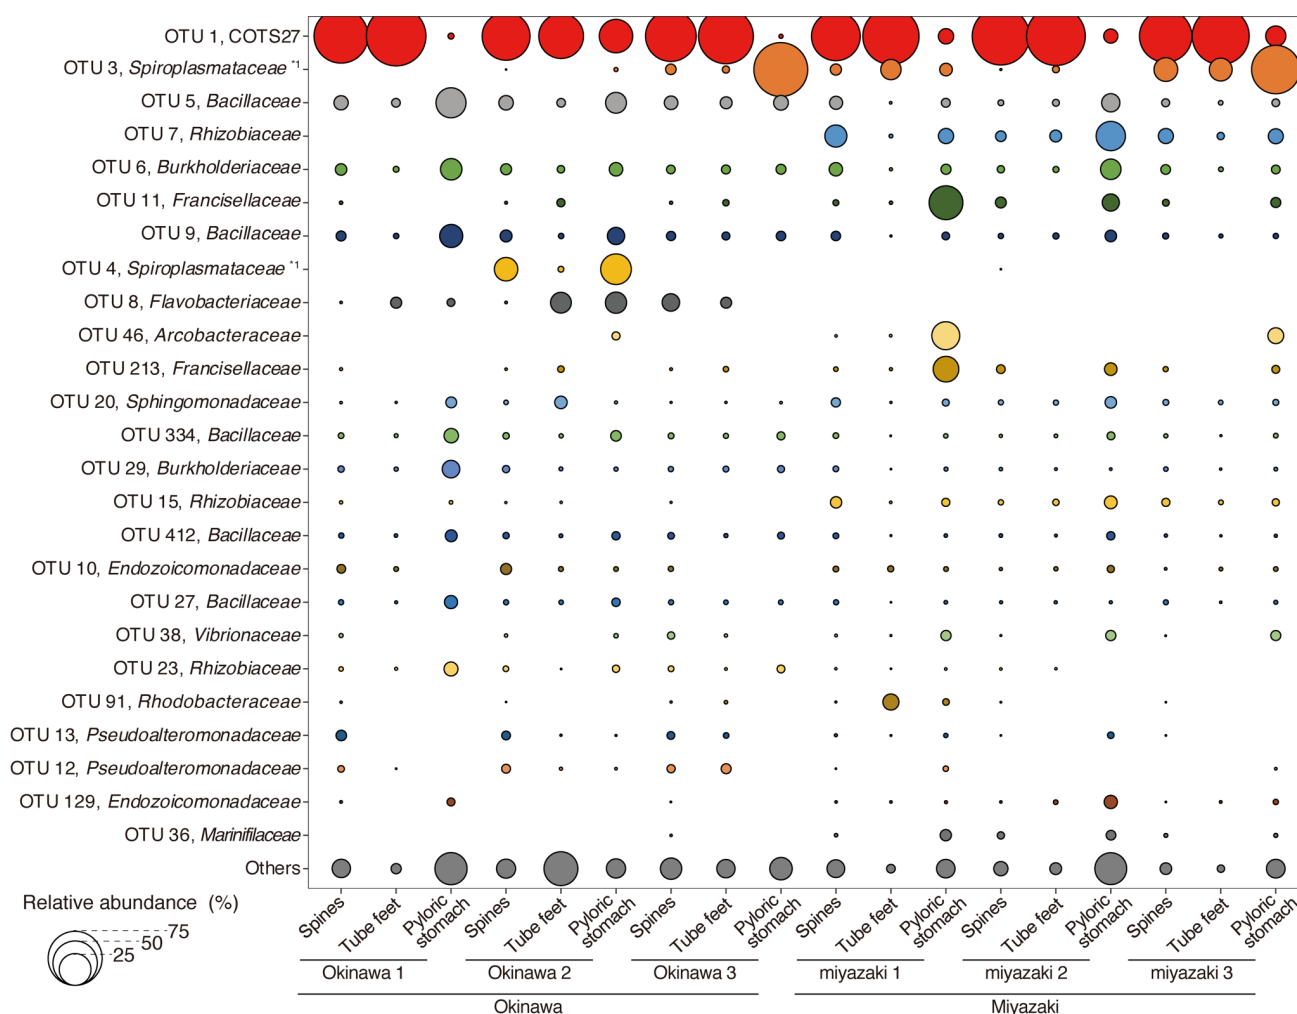

624  
 625 **Fig. 2 The relative abundances of the 25 most abundant OTUs, including COTS27 (OTU 1;**  
 626 **red), in the total samples analysed in this study.**

627 The bubble chart of the relative abundances was calculated from the merged replicates of each body  
 628 part (spines, tube feet, and pyloric stomachs) in each COTS individual. The phylogenies of each  
 629 OTU were determined based on the results (best hit) of BLAST searches against the NCBI nr/nt  
 630 database. \*1: The phylogenies of OTU3 and OTU4 were determined in the All-species Living Tree  
 631 Project and RDP databases, respectively.

632

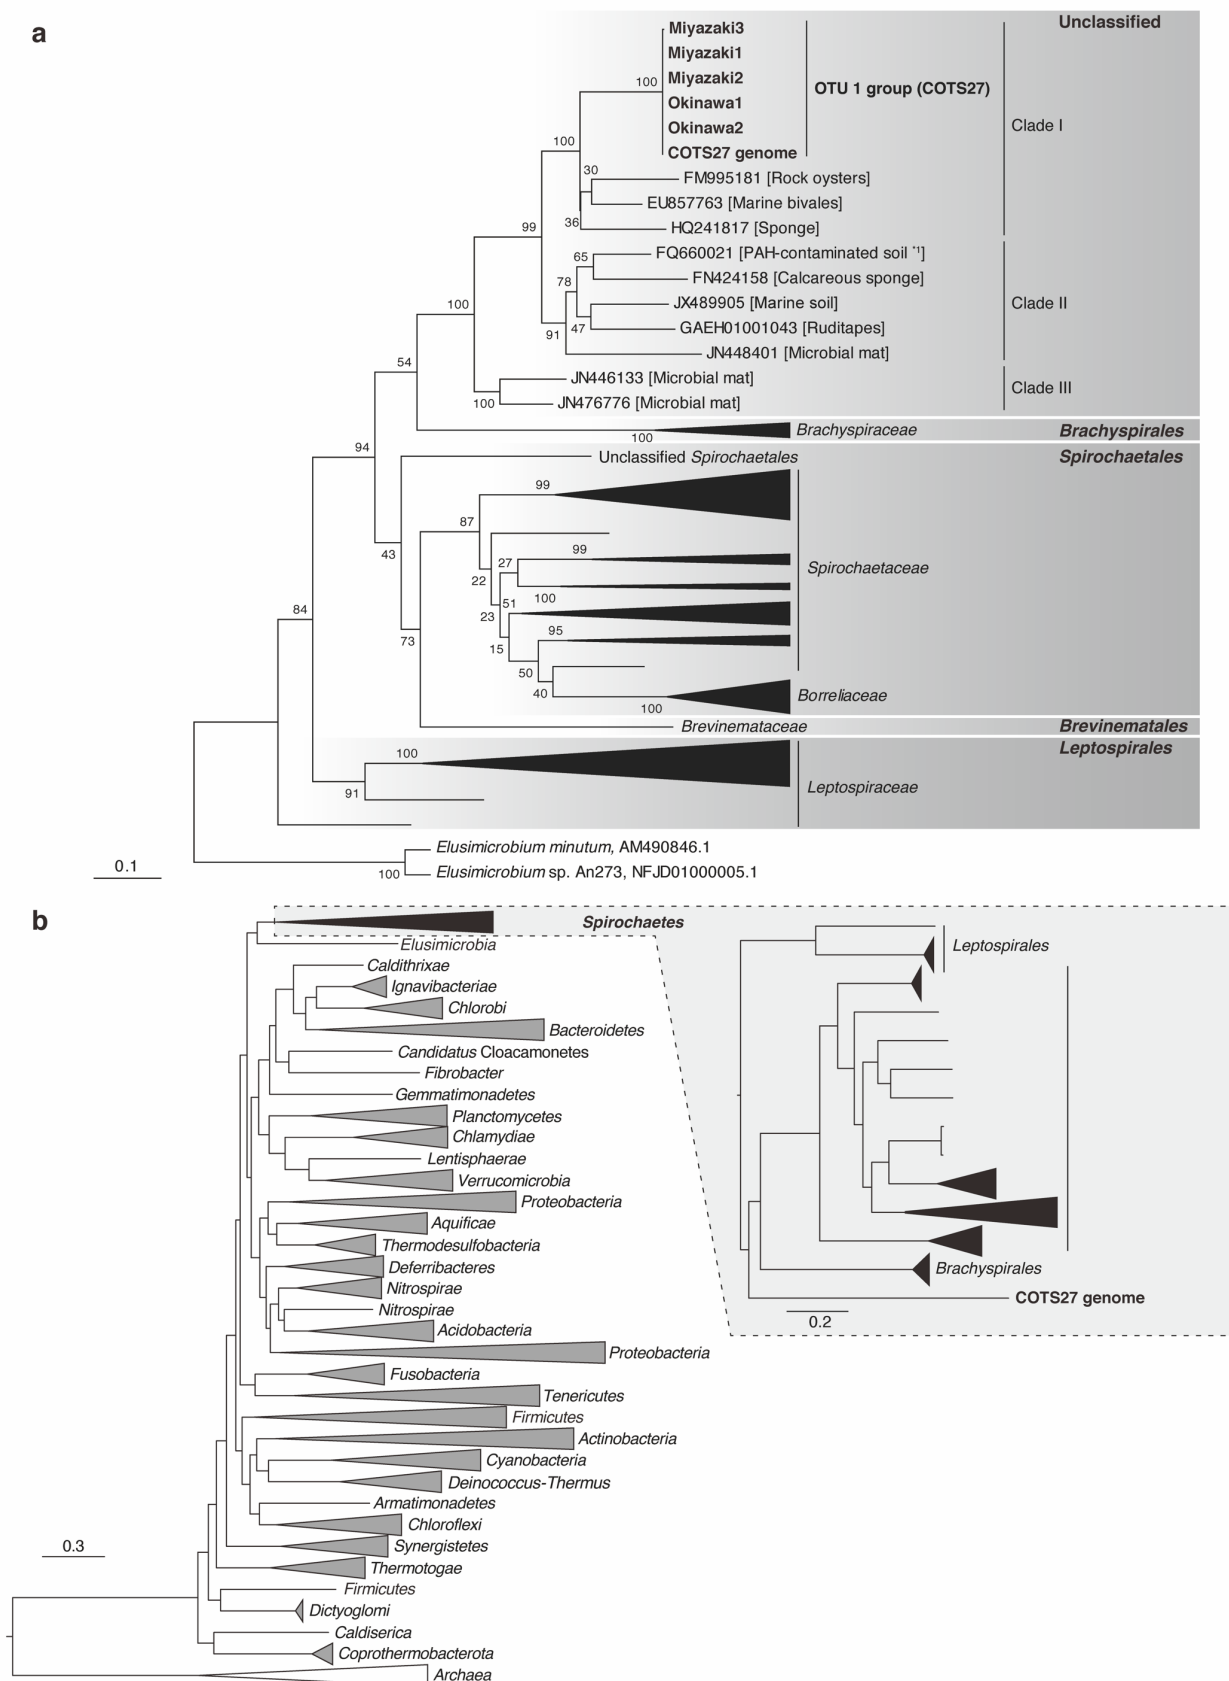

633

634 **Fig. 3 The phylogenetic position of the dominant OTU 1 (COTS27) in the phylum *Spirochaetes*.**

635 Maximum likelihood (ML) trees were constructed based on the full-length 16S rRNA gene  
636 sequences (a) and the sequences of 43 conserved marker genes identified by CheckM (b). The  
637 bootstrap values in (a) were calculated by resampling 1,000 times. The scale bars indicate  
638 substitutions per site. \*1: The gene with accession No. FQ660021.1 in panel (a) was obtained from a  
639 polycycle aromatic hydrocarbon (PAH)-contaminated soil sample in a mitigated wetland.  
640

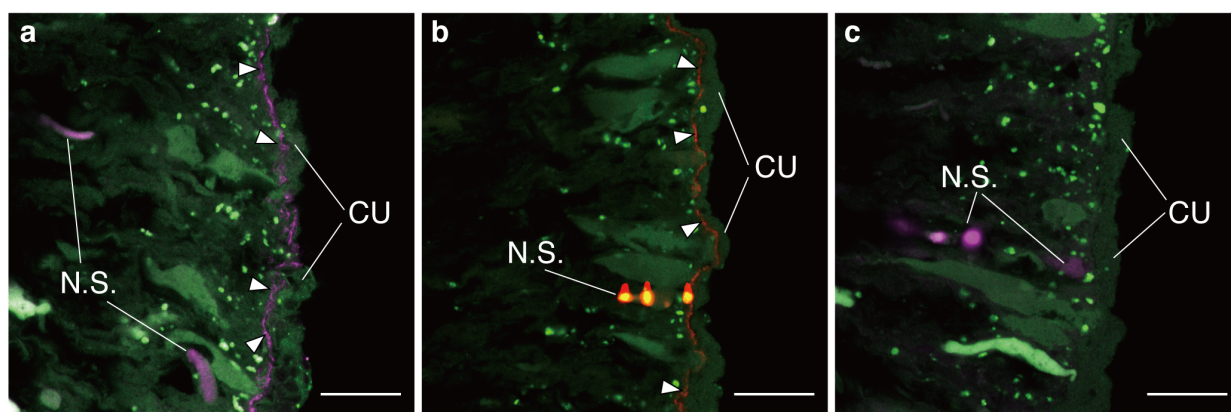

641  
642 **Fig. 4 FISH analysis of three serial sections of a COTS disc spine.**

643 Each section was hybridized with the EUB338mix (a, purple; a general probe for bacteria),  
644 COTSsymb (b, red; a COTS27-specific probe), or Non338 (c, purple; a negative control to detect  
645 non-specific binding) probes. The probes were labelled with Cy3 in all panels and coloured with  
646 purple in panels a and c and with red in panel b. The green signals are tissue-derived  
647 autofluorescence. The arrowheads in panels a and b indicate layer-like signals from the general  
648 probe for bacteria (a) and the COTS27- specific probe (b). N.S. and CU indicate regions with non-  
649 specific binding and the outer cuticle complex, respectively. The scale bars represent 20  $\mu\text{m}$  (a-c).  
650



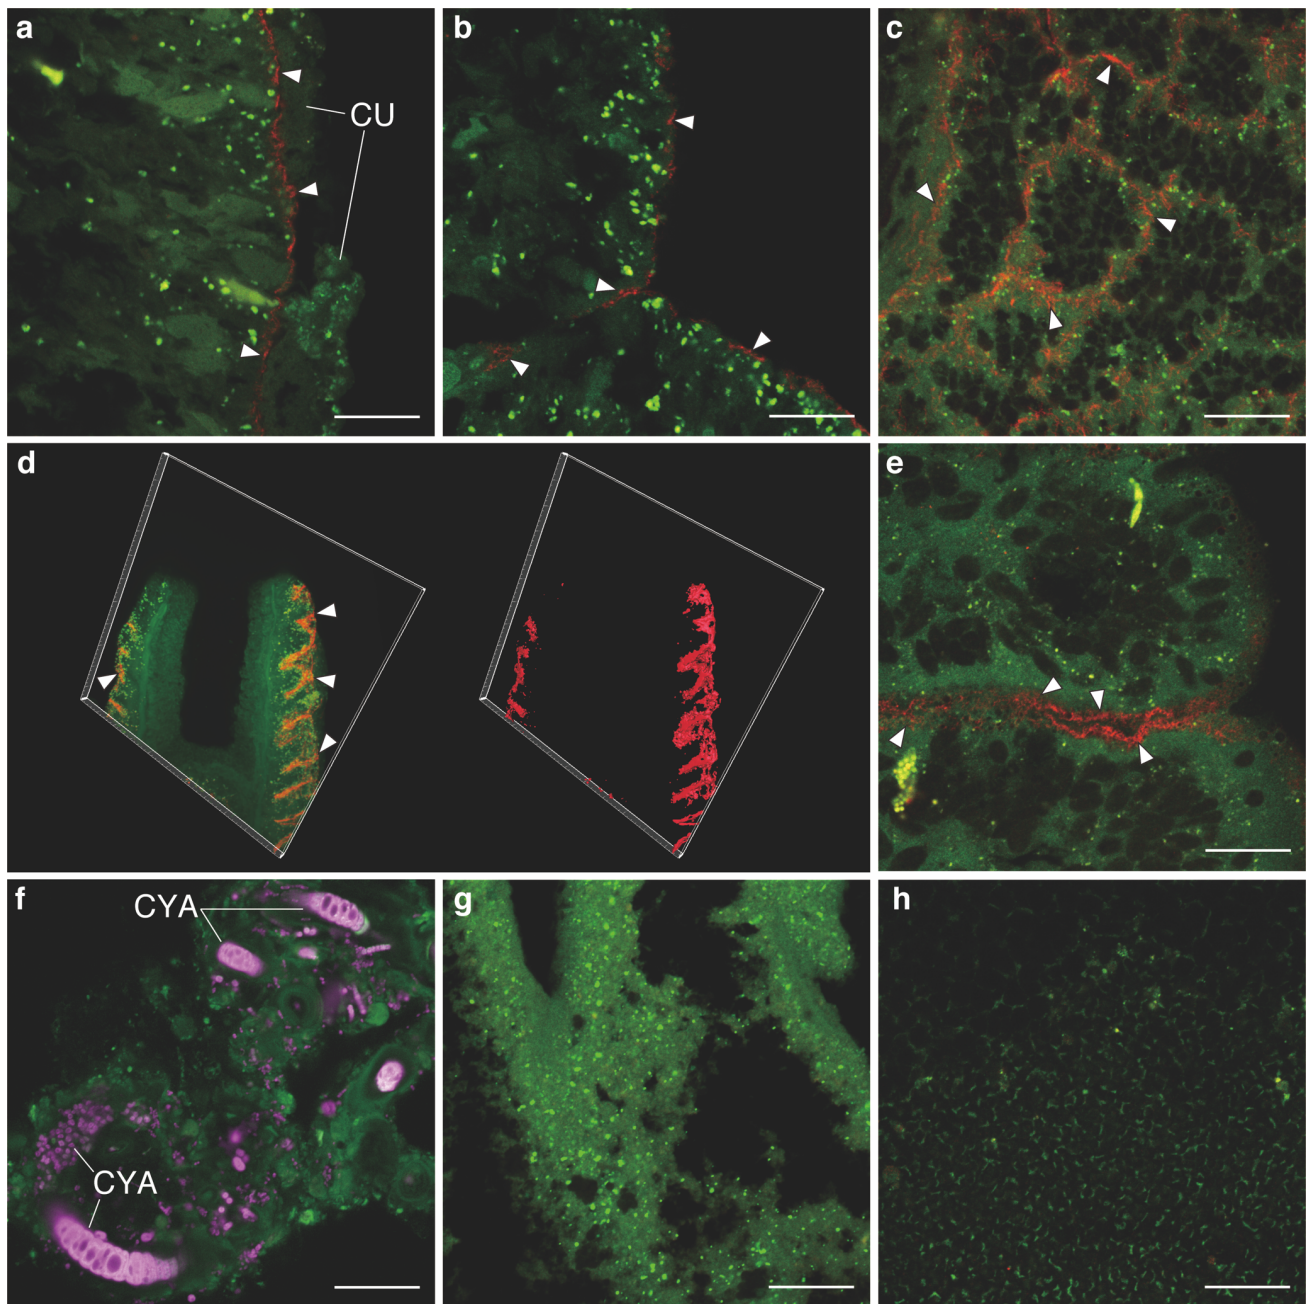

651

652 **Fig. 5 Visualization of the COTS27 cells in different body parts of COTS using FISH.**

653 COTS27 cells (red) residing in the subcuticular spaces of the body walls were detected with  
654 COTSSymb, a COTS27-specific probe, in the tips (a) and bases (b) of aboral spines on the discs and  
655 arms, respectively, dermal papula (c), pedicellariae on the aboral side (d; 3D image [left] and 3D  
656 rendering image [right]), and tube feet (e). Many non-COTS27 bacteria (purple) were detected in the  
657 pyloric stomachs (f) using the EUB338mix probe. No visible bacteria were detected in the pyloric  
658 caeca (g) and gonads (h) in this study (the images were obtained applying the COTS27-specific  
659 probe). The arrowheads indicate signals from COTS27. The green signals are tissue-derived  
660 autofluorescence. CU: outer cuticle complex; CYA: cyanobacteria-like cells. Scale bars (a–c and e–  
661 h) indicate 20 μm. The 3D image in panel (d) was taken with an original objective of x40.

662

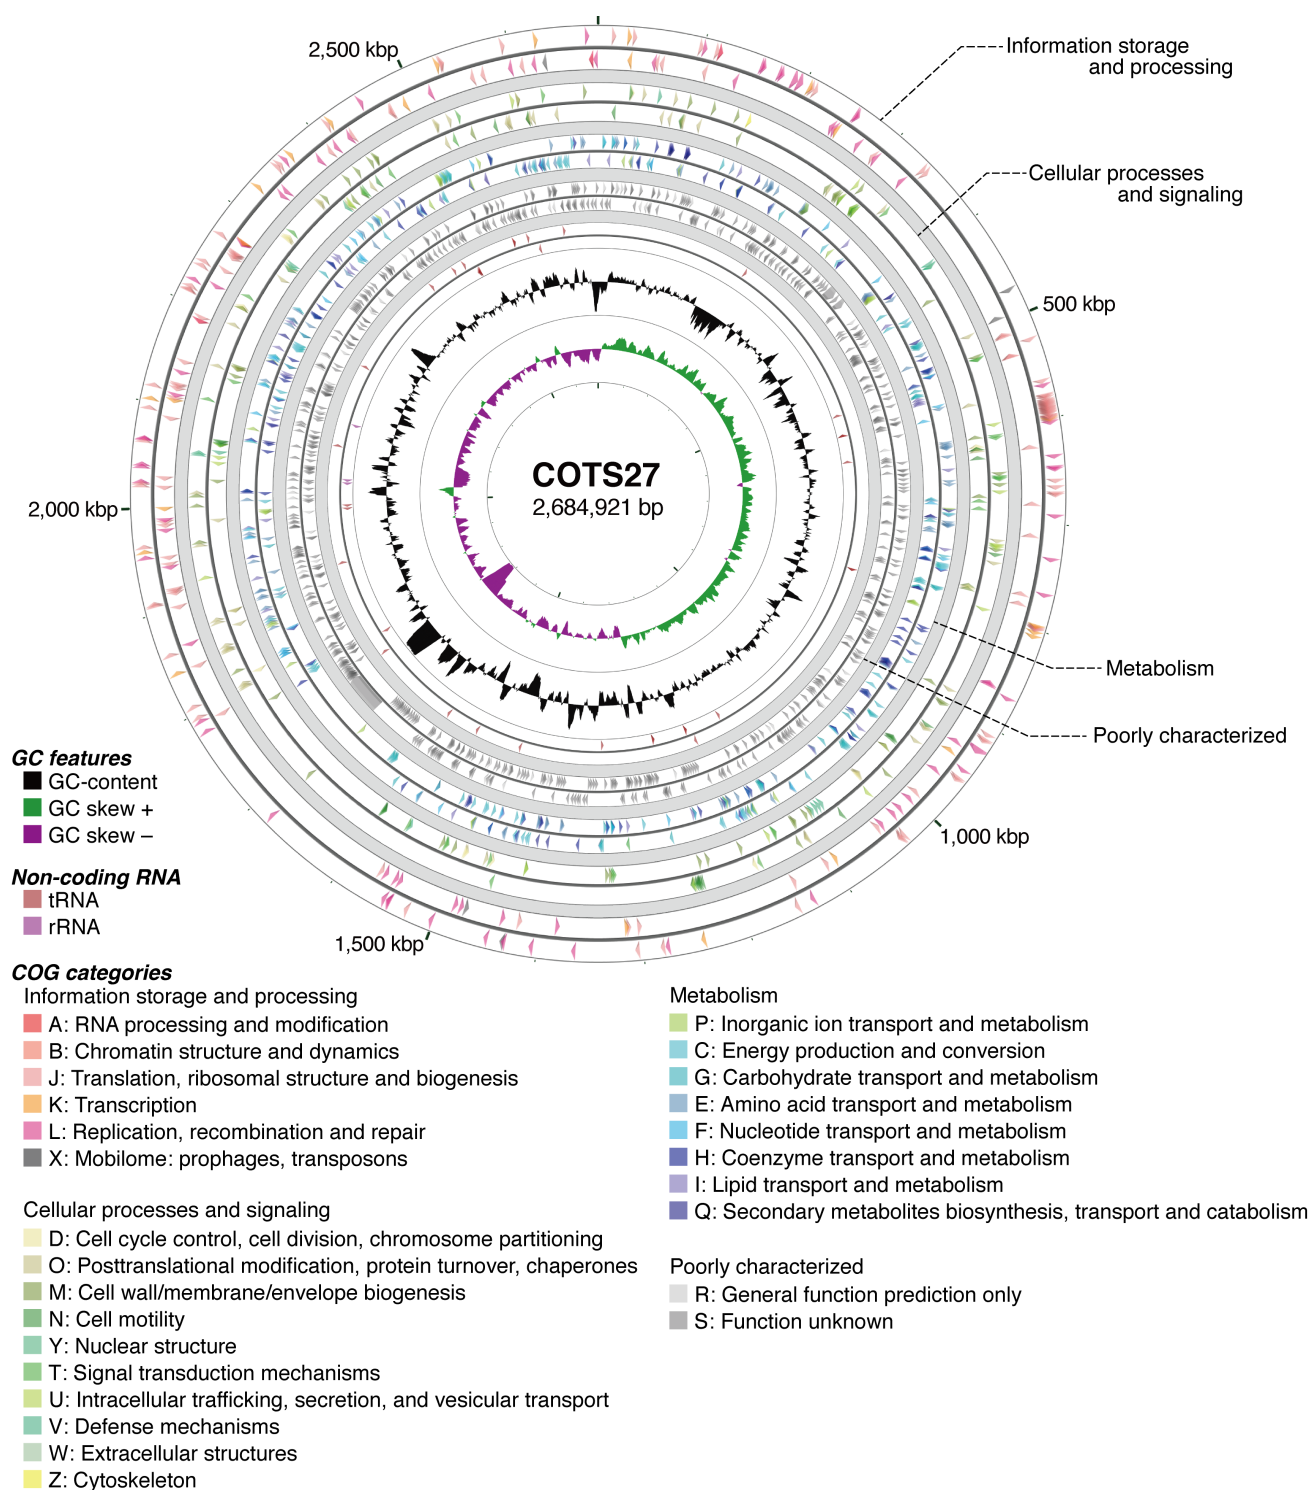

663

664 **Fig. 6 Circular view of the COTS27 chromosome.**

665 From the outside to the centre, each circle indicates forward strand CDSs; reverse strand CDSs;

666 forward strand tRNA and rRNA genes; reverse strand tRNA and rRNA genes; GC-content; and GC

667 skew. The CDSs were coloured according to the COG functional category of each CDS. The circular

668 maps were created using CGView Server and the designations were then superposed manually.
